# Supplementary material
Source: MDPI journal article supplement (https://www.mdpi.com/2073-4441/12/9/2536)
Supplement: s1 [file s1]

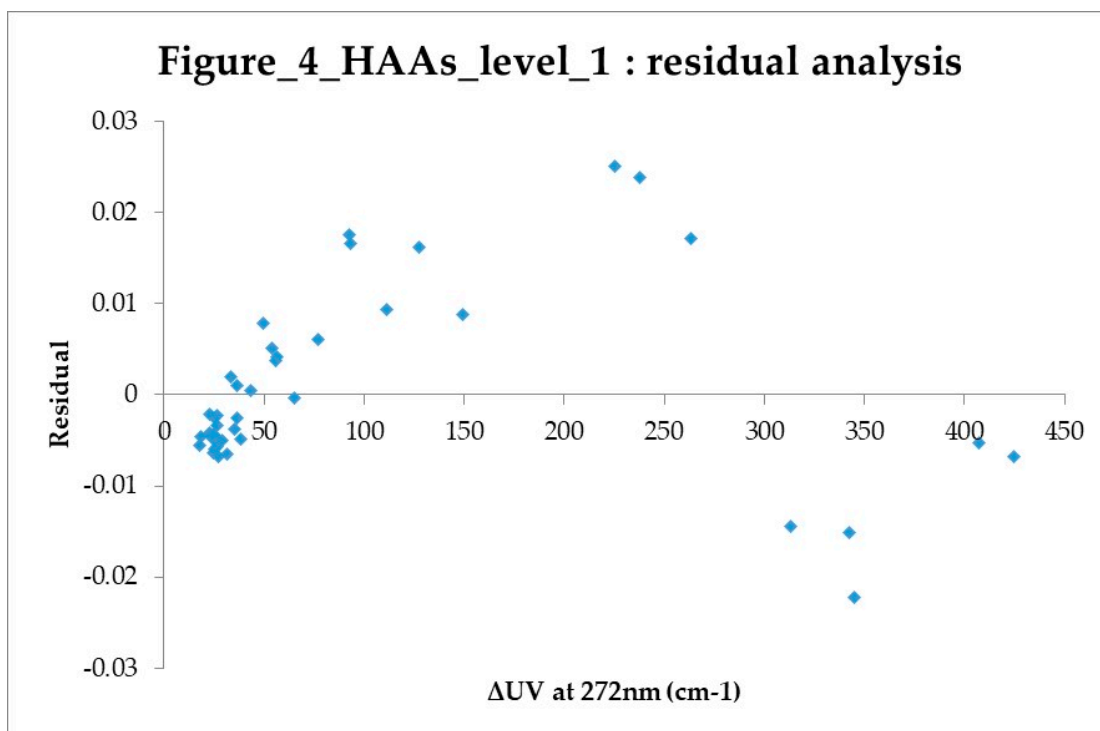

Supplementary Figure S1: Residual analysis of HAAs\_level\_1 linear regression

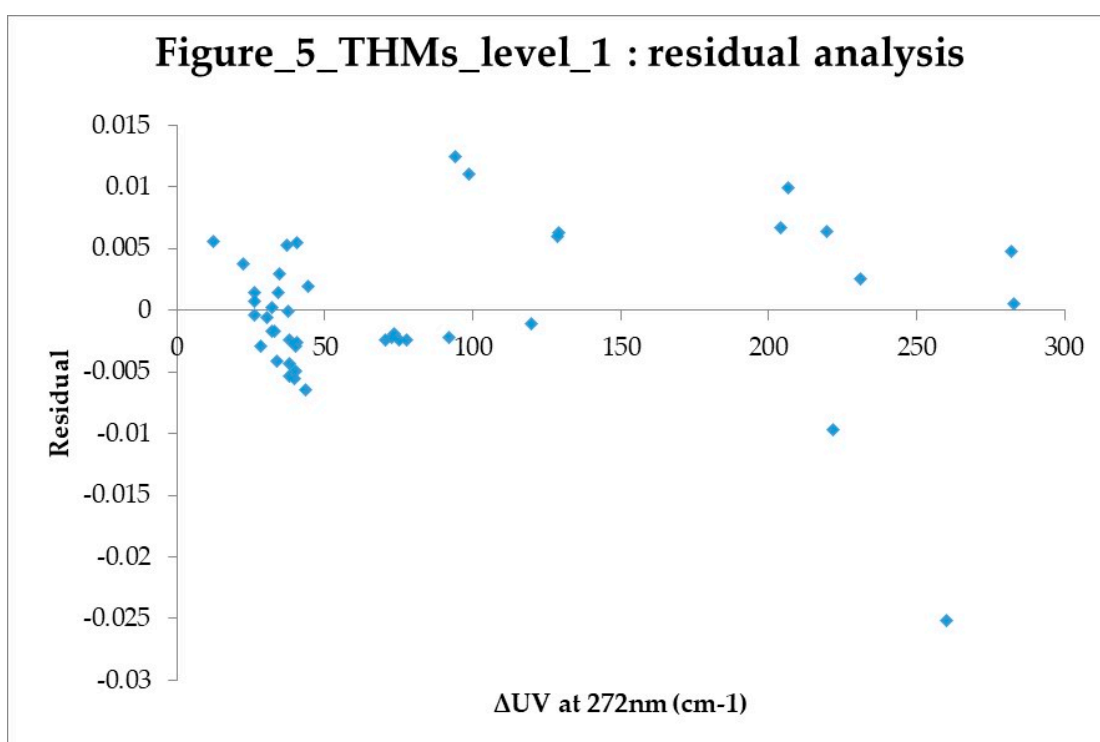

Supplementary Figure S2: Residual analysis of THMs\_level\_1 linear regression

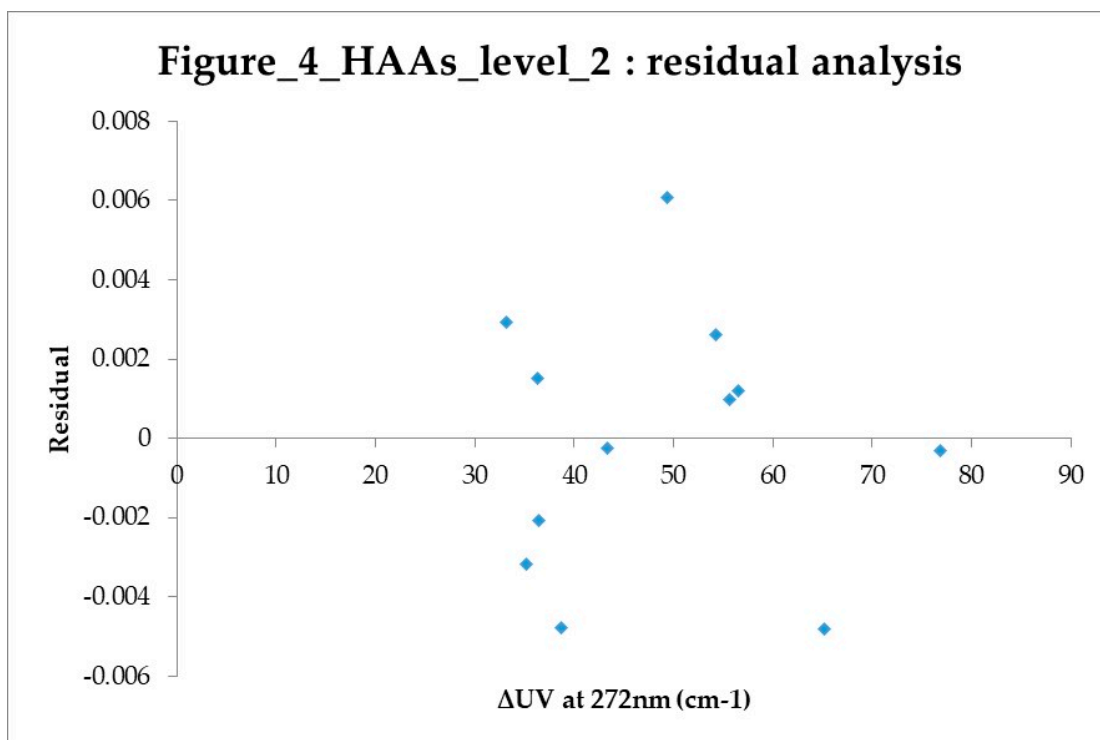

**Supplementary Figure S3:** Residual analysis of HAAs\_level\_2 linear regression

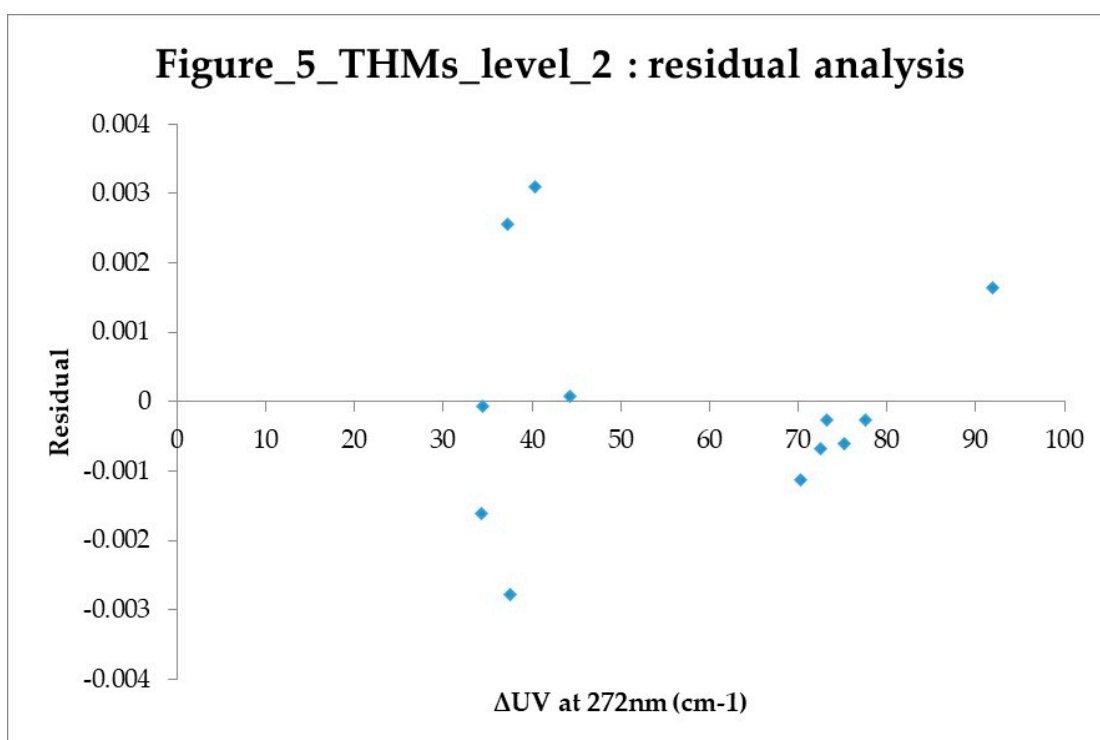

**Supplementary Figure S4:** Residual analysis of THMs\_level\_2 linear regression
